# Supplementary material for: Integrative analysis of microRNA and mRNA expression profiles in fetal rat model with anorectal malformation
Source: PeerJ journal article supplement (doi:10.7717/peerj.5774), 2018-10-24
Supplement: Supplymentary_material_1.pdf [file Supplymentary_material_1.pdf]

## Supplymentary material 1

**A**

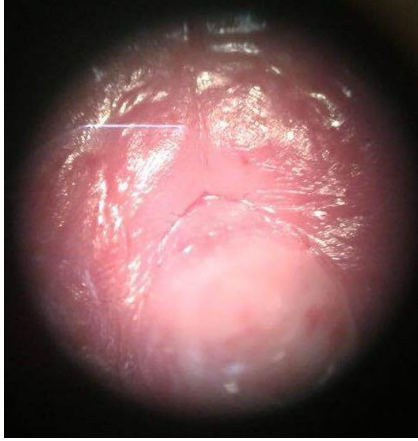

**B**

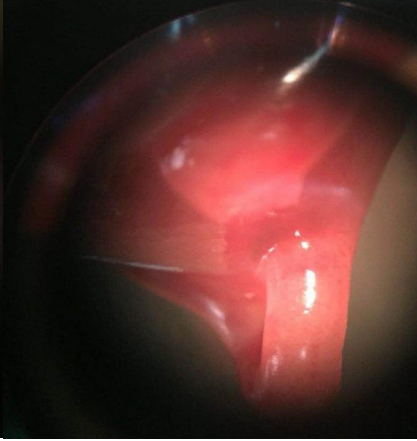

**C**

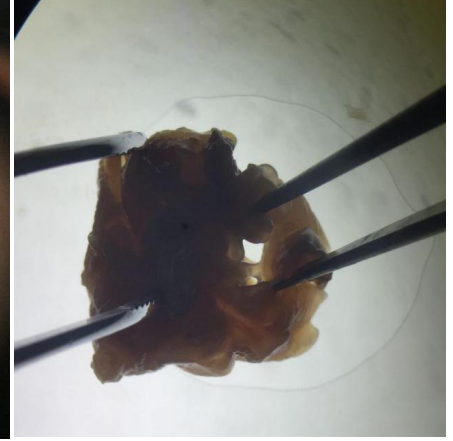

**A** The appearance of the anus of control E20 fetal rat under the stereomicroscope. **B** The appearance of the anus of ARM E20 fetal rat under the Stereomicroscope. **C** The hindgut tissue of fetal rats of E20
